# Supplementary material for: Sox9 and Rbpj differentially regulate endothelial to mesenchymal transition and wound scarring in murine endovascular progenitors
Source: PubMed Central journal article supplement (PMC8105340; doi:10.1038/s41467-021-22717-9), 2021-05-07
Supplement: 41467_2021_22717_MOESM1_ESM.pdf [file 41467_2021_22717_MOESM1_ESM.pdf]

## Supplementary Information

### **Sox9 and Rbpj regulate endothelial to mesenchymal transition and scarring in murine endovascular progenitors**

**Authors:** Jilai Zhao<sup>1\*</sup>, Jatin Patel<sup>1,2\*</sup>, Simranpreet Kaur<sup>1</sup>, Seen-Ling Sim<sup>1</sup>, Ho Yi Wong<sup>1</sup>, Cassandra Styke<sup>1</sup>, Isabella Hogan<sup>1</sup>, Sam Kahler<sup>1</sup>, Hamish Hamilton<sup>1</sup>, Racheal Wadlow<sup>1</sup>, James Dight<sup>1</sup>, Ghazaleh Hashemi<sup>1</sup>, Laura Sormani<sup>1</sup>, Edwige Roy<sup>1</sup>, Mervin C. Yoder<sup>3</sup>, Mathias Francois<sup>4,5</sup>, Kiarash Khosrotehrani

#### **Affiliations:**

<sup>1</sup>The University of Queensland Diamantina Institute, The University of Queensland, Woolloongabba, QLD 4102, Australia

<sup>2</sup>Centre for Ageing Research Program, Queensland University of Technology, Woolloongabba, QLD 4102, Australia

<sup>3</sup>Indiana Center for Regenerative Medicine and Engineering, Indiana 46202, United States of America

<sup>4</sup>The David Richmond Laboratory for Cardiovascular Development: Gene Regulation and Editing Program, The Centenary Institute, Camperdown, NSW 2050, Australia

<sup>5</sup> The School of Life and Environmental Sciences, Faculty of Science, The University of Sydney, Camperdown, NSW 2006, Australia

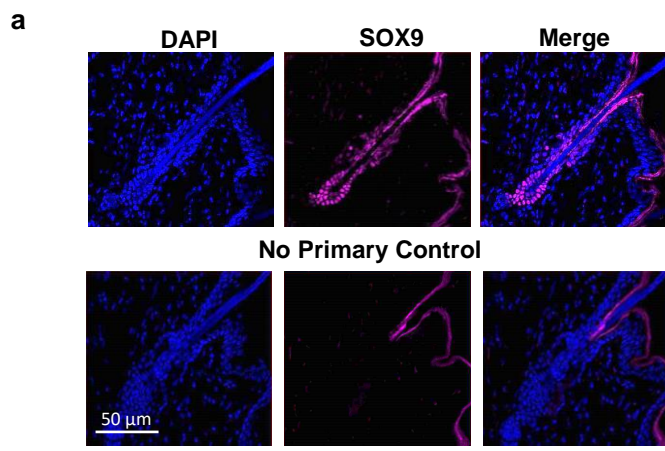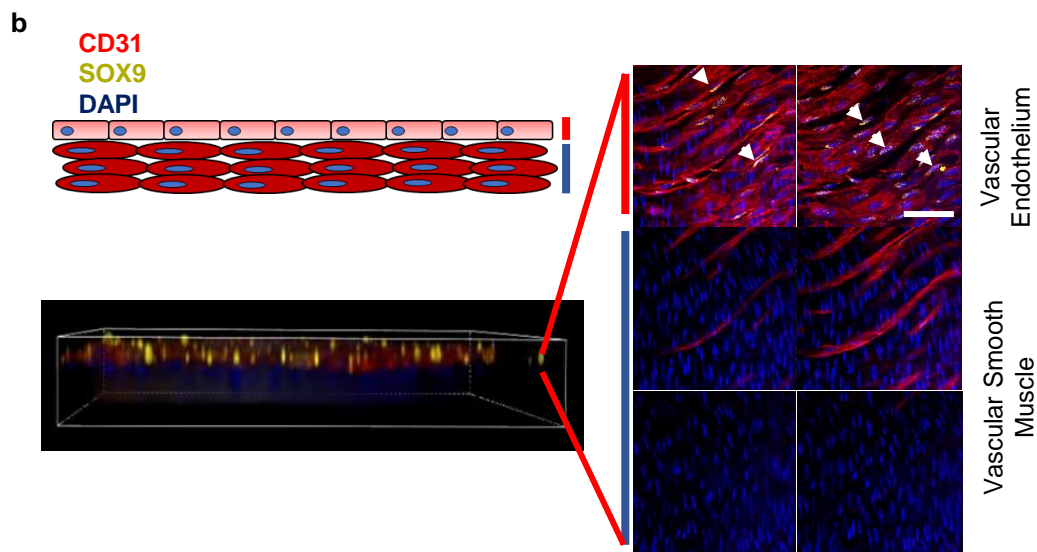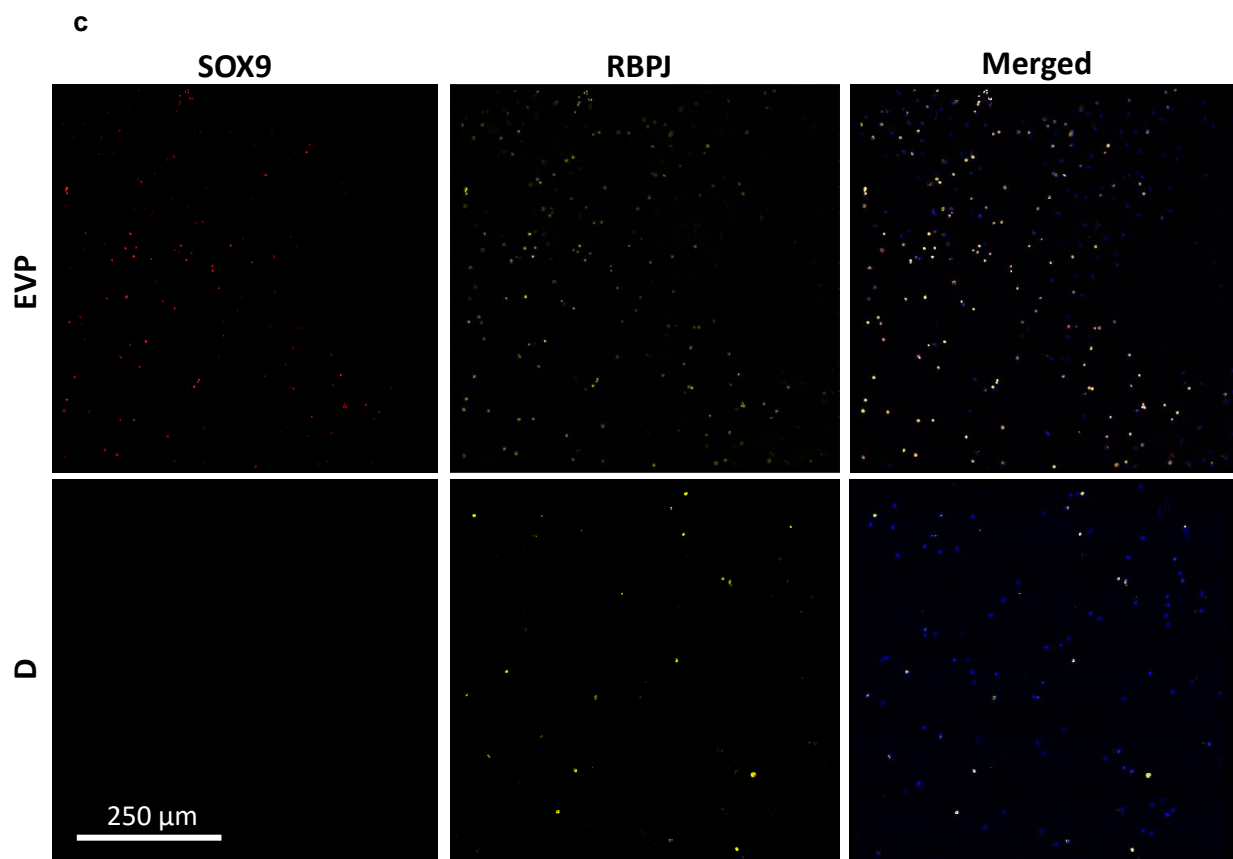

## **Supplementary Figure 1. Specificity of SOX9 antibody and SOX9 expression in the endothelium**

- a) SOX9 immunostaining in skin, showing positive staining within resting telogen hair-follicles mostly around the bulge area. Scale bar represents 100 $\mu$ m.
- b) SOX9 staining in whole mount aorta, demonstrating the positive staining in the endothelial layer co-localising with CD31.
- c) Large tile-scan of sorted aortic EVPs and D cells stained for DAPI (blue) SOX9 and RBPJ showing increase SOX9 and RBPJ staining in the EVP population.

a

*Cdh5Cre<sup>ERT2</sup>/ROSA-YFP*

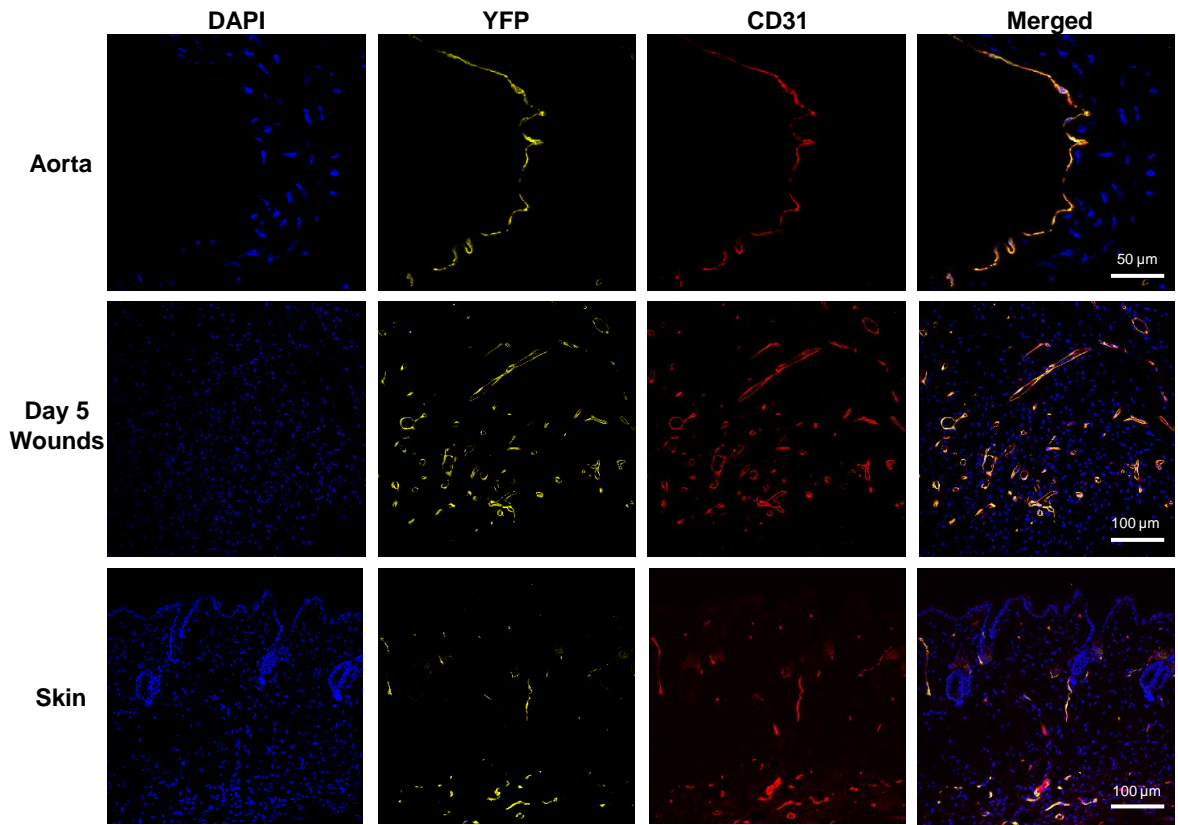

b

*Sox9Cre<sup>ERT2</sup>/ROSA-YFP*

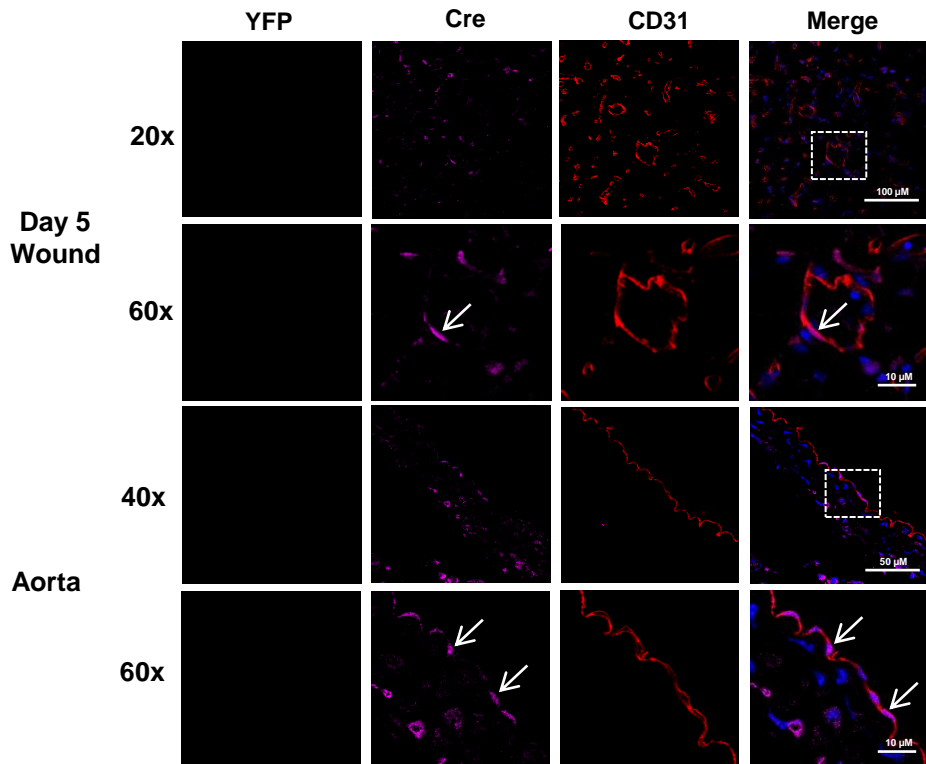

## Supplementary Figure 2. Specificity of the Cre/ER model

a) *Cdh5Cre<sup>ER</sup>/RosaYFP* mice were injected with tamoxifen and immediately collected for analysis in homeostasis (skin and aorta) or after wounding (D5 wound): Immunofluorescent images of Cre-activated YFP and pan-endothelial marker CD31 expression within a range of organ beds show colocalization in all scenarios ensuring endothelial staining.

b) Sox9 reporter model further demonstrates Sox9 expression in the endothelium. Immunofluorescent images of nuclear Cre expression driven by the *sox9* promoter within the granulation tissue and aorta of *Sox9Cre<sup>ER</sup>/RosaYFP* mice co-localizing to the vasculature. Of interest, despite tamoxifen delivery, this model did not allow YFP expression.

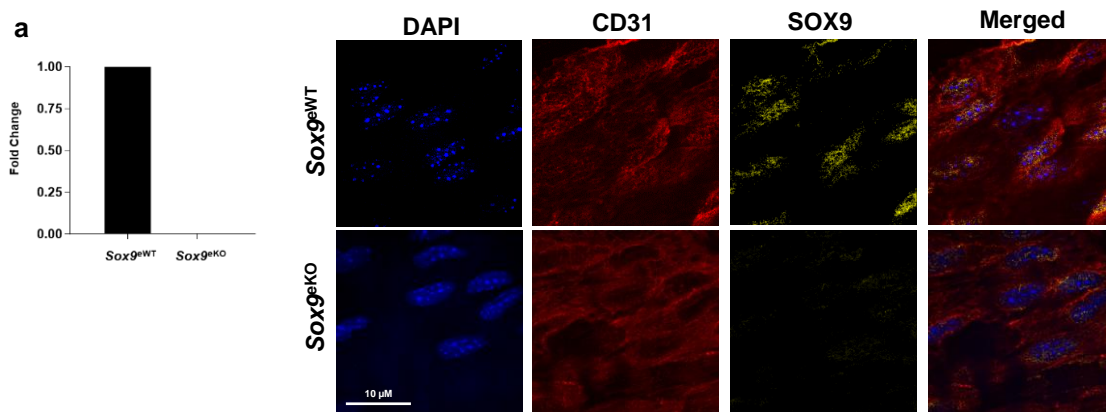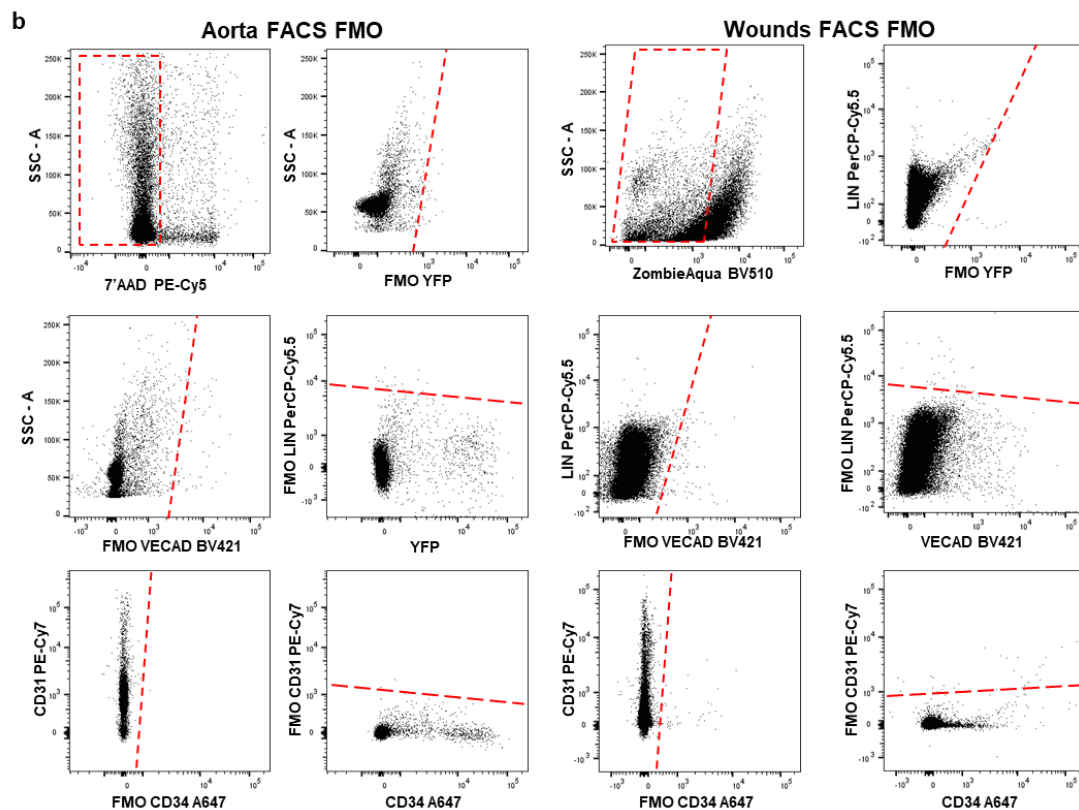

### Supplementary Figure 3. Validation of SOX9 knockout and fluorescent-minus-one controls

**a)** Validation of conditional deletion of Sox9, Loss of SOX9 expression in endothelial cells following conditional knockout using the *sox9<sup>fl/fl</sup>.Cdh5Cre<sup>ER</sup>/RosaYFP (Sox9<sup>eKO</sup>)* mice.

**b)** Fluorescence-minus-one (FMO) controls established to conduct flow cytometry analysis in the aorta and wounds.

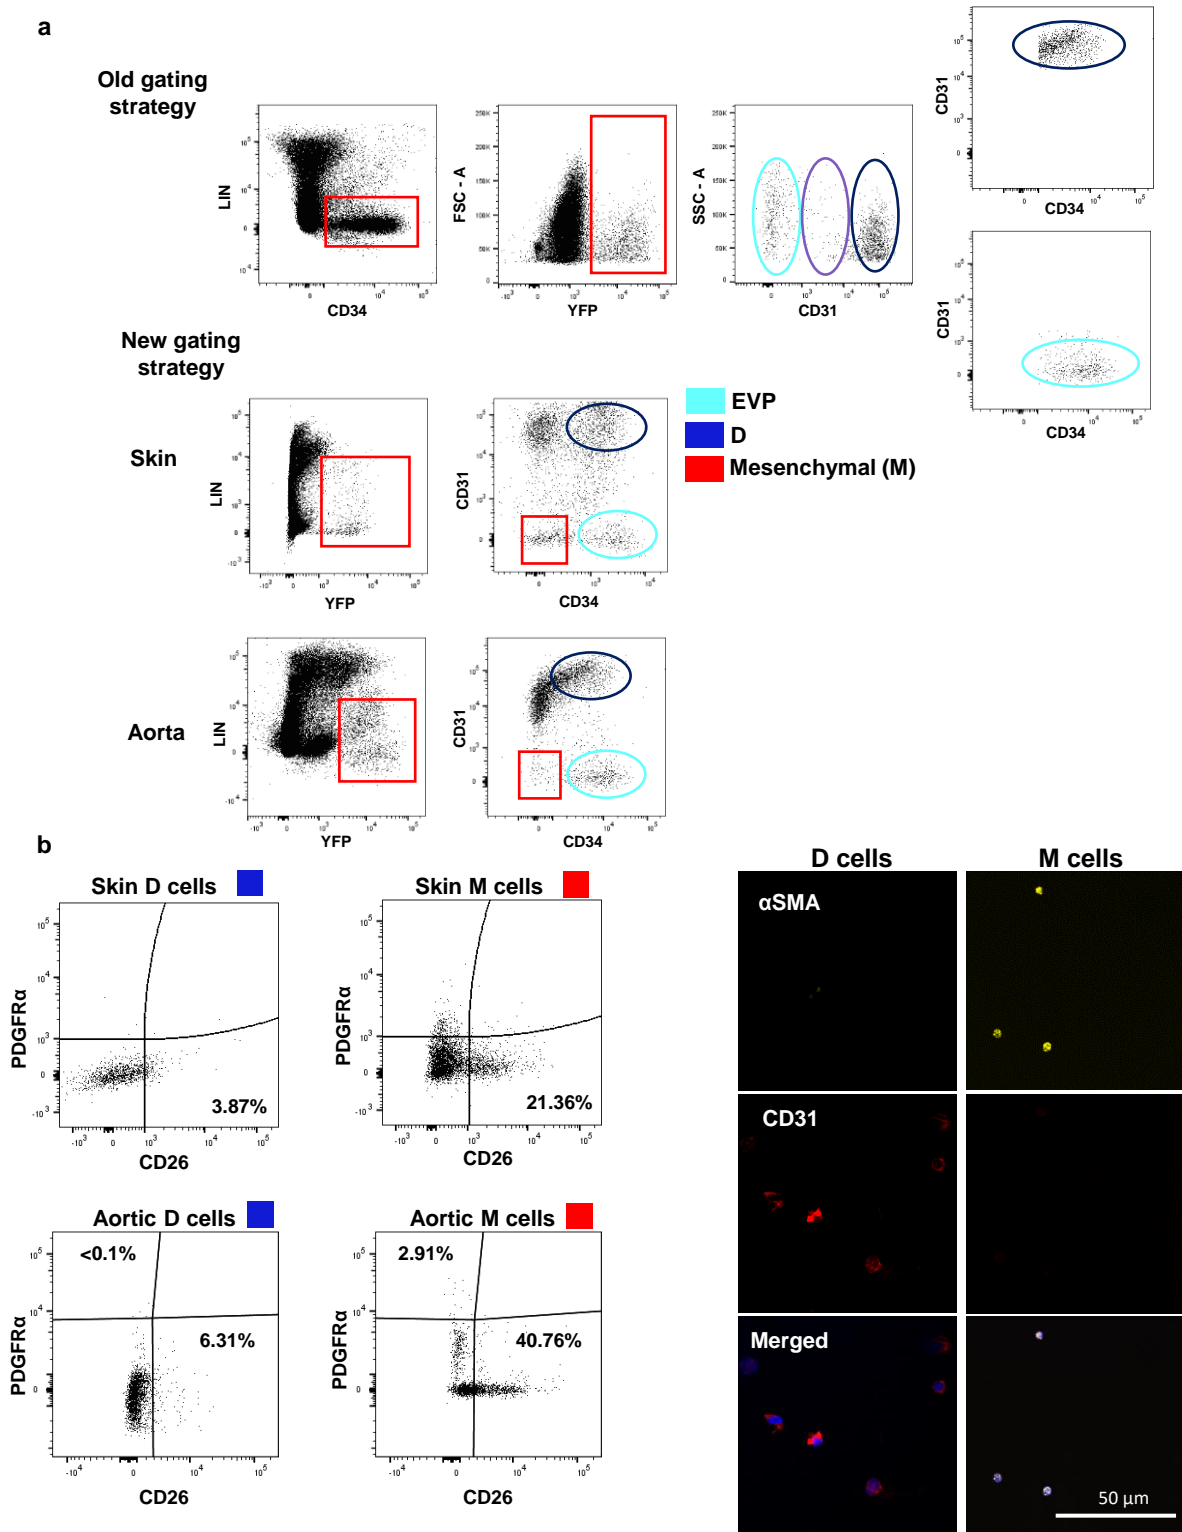

### Supplementary Figure 4. Endovascular progenitor FACS gating and validation

**a)** Flow cytometry strategy of a newly established gating strategy to identify an additional M population within the total endothelial fraction ( $\text{Lin}^{\text{neg}}\text{YFP}^+\text{CD31}^{\text{neg}}\text{CD34}^{\text{neg}}$ ).

**b)** Surface expression of key mesenchymal markers (CD26 and PDGFR $\alpha$ ) are at a higher level in the M population compared to differentiated endothelial D cells. Sorted D and M cells shows exclusive expression of  $\alpha$ SMA within the M population whereas M cells lack CD31.



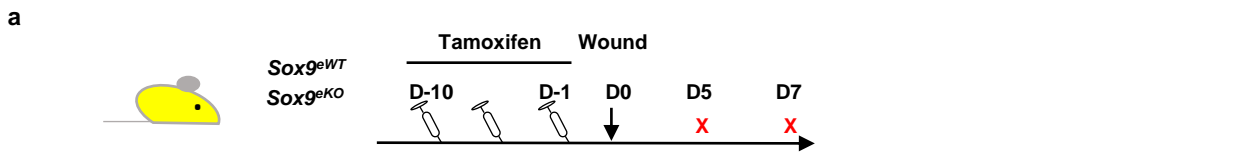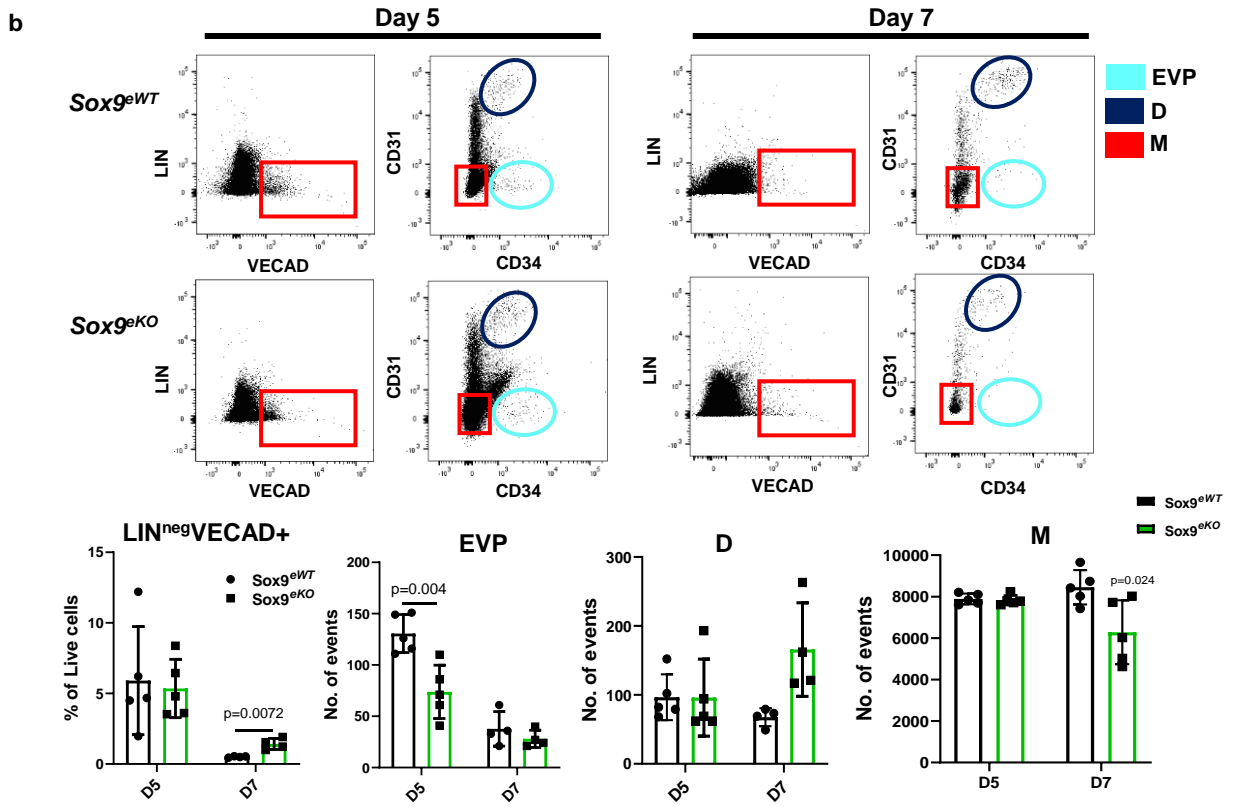

**c** Day 5 wound (granulation tissue)

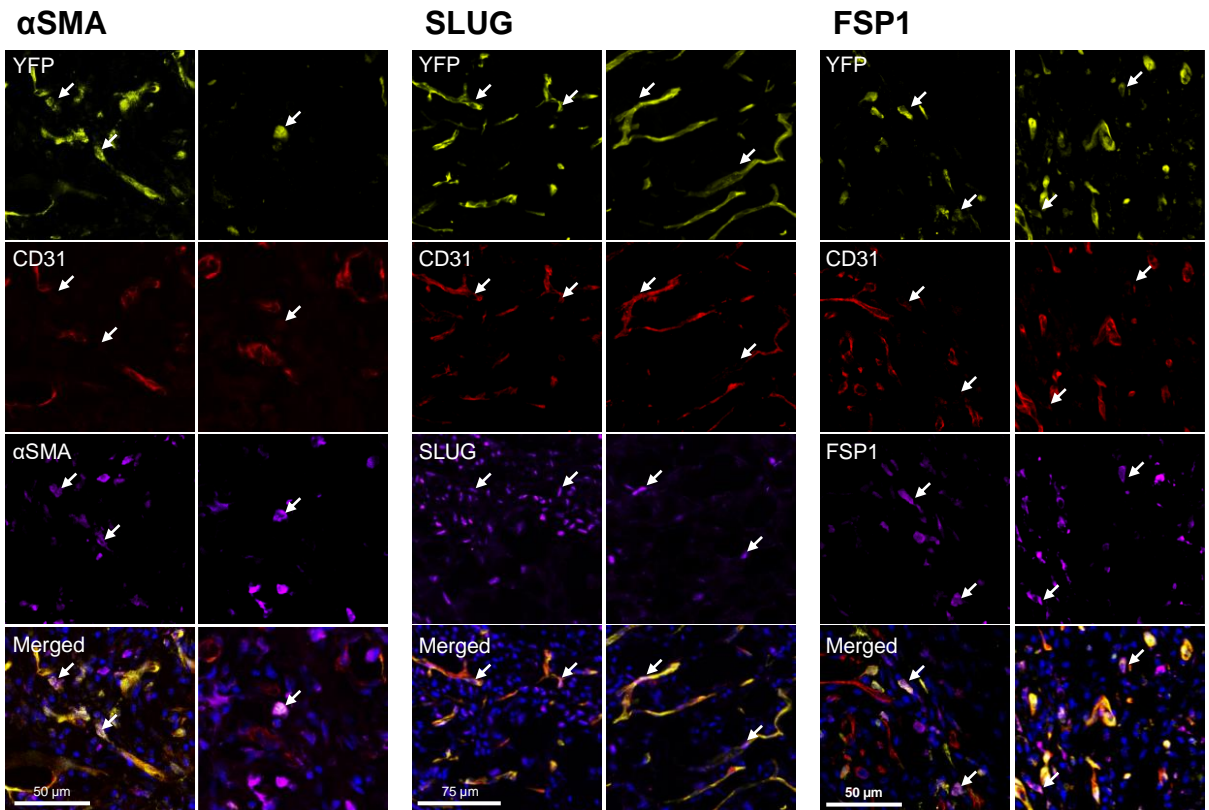



## Supplementary Figure 5. EndMT evaluation in *Sox9eKO* wounds over time

- a) Schematic representation demonstrating experimental set up using conditional vascular specific *Sox9* knockout mice (*Sox9<sup>fl/fl</sup>/Cdh5-Cre<sup>ER</sup> RosaYFP – Sox9<sup>eKO</sup>*) in the full-thickness 6mm punch wound model.
- b) FACS gating strategy to identify the total endothelial population (Lin<sup>neg</sup>VECAD<sup>+</sup>), EVPs, D and M cells at D5 and D7 within the granulation tissue. The number of total endothelial cells significantly decreased over time, however *Sox9<sup>eKO</sup>* resulted in a larger total endothelial population in the D7 wound compared to *Sox9<sup>eWT</sup>*. The number of EVPs was also significantly reduced within the *Sox9<sup>eKO</sup>* D5 wound as well as a decrease in the M population within the D7 wound. (\*p<0.05 \*\*p<0.01 vs *Sox9<sup>eWT</sup>*; n=5 biologically independent animals; mean ± SD; p value was calculated by multiple two-tailed unpaired t tests).
- c) Immunofluorescence staining of endothelial markers CD31 and YFP with EndMT markers SLUG, and αSMA and FSP1 demonstrates their co-localisation with YFP<sup>+</sup> cells within the D5 wound.

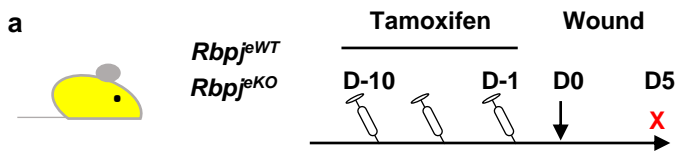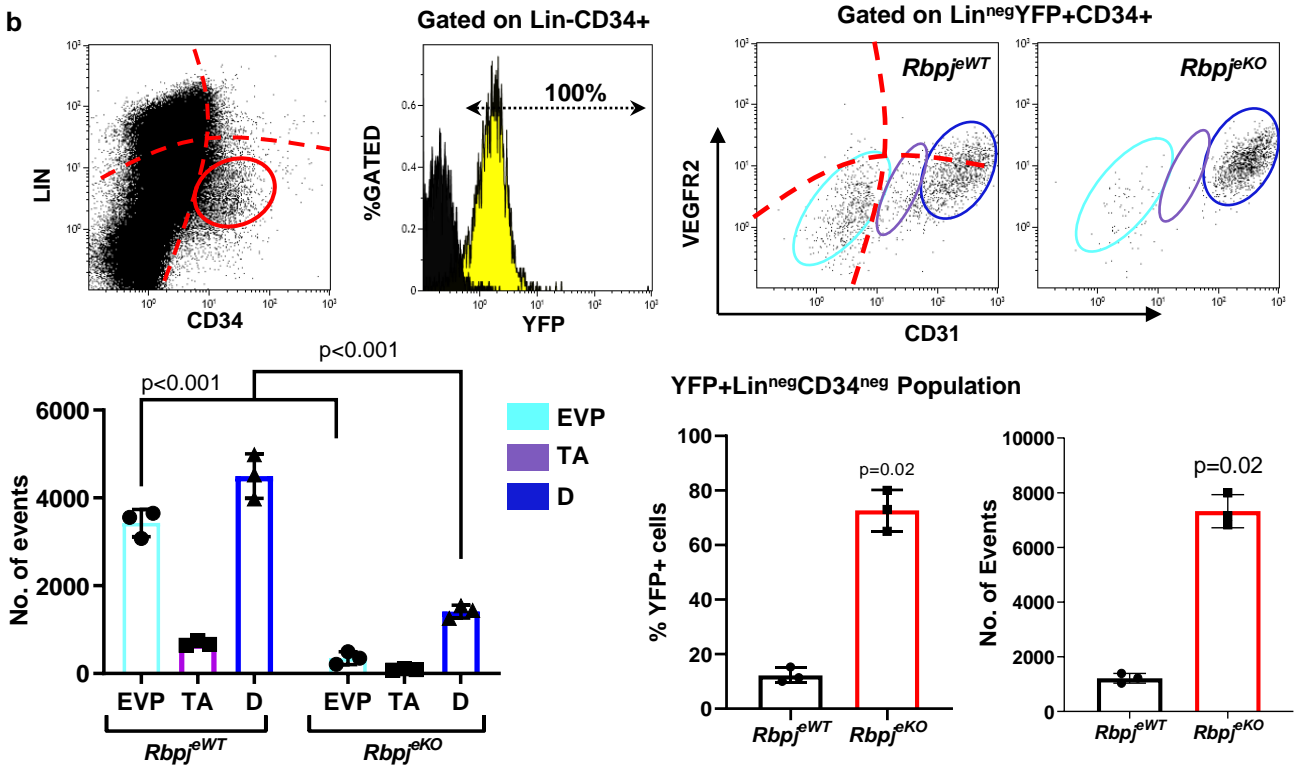

**c** Activated Notch1

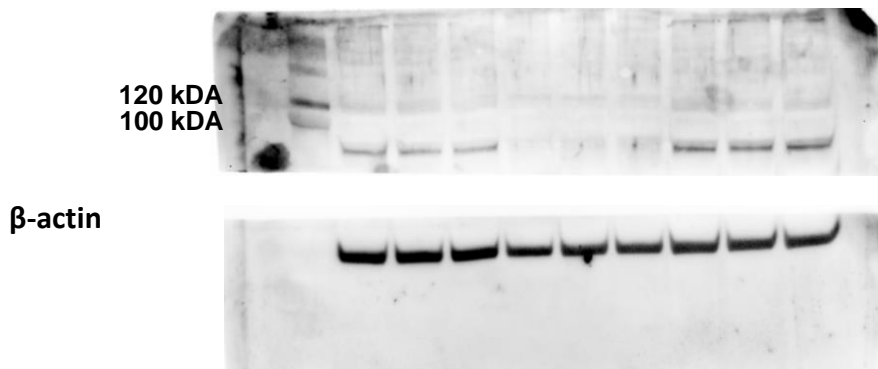

## Supplementary Figure 6. EndMT evaluation in *RbpjeKO* wounds

- a) Schematic diagram demonstrating experimental set up using conditional vascular specific *Rbpj* knockout mice (*Rbpj<sup>fl/fl</sup>/Cdh5-Cre<sup>ER</sup> RosaYFP – Rbpj<sup>eKO</sup>*).
- b) Flow cytometry plots showing the wound vascular endothelium harbour a distinct CD34 positive, lineage (Lin) negative population (red gate) that is entirely YFP. Three distinct populations were observed based on CD31 and VEGFR2 expression showing the endothelial hierarchy and changes between wild-type controls (*Rbpj<sup>eWT</sup>*) and *Rbpj<sup>eKO</sup>* mice after 10 days tamoxifen induction. (p<0.001 vs *Rbpj<sup>eWT</sup>*; n=3 biologically independent animals; mean ± SD; p value was calculated by 2-way ANOVA with multiple comparison of row mean). Flow cytometry analysis showed increased loss of endothelial phenotype amongst YFP+ cells from the *Rbpj<sup>eKO</sup>* mice as demarcated by the loss of CD34 expression. (p=0.02 vs *Rbpj<sup>eWT</sup>*; n=3 biologically independent animals; mean ± SD; p value was calculated by two-tailed unpaired t test)
- c) Original immunoblot from Fig 5C. Ladder marker sizes shown on the left. Activated Notch1 expected molecular weight is 80 kDA. β-actin expected molecular weight is 42 kDA. Two membranes were derived from one gel and cut and 55 kDA, imaged separately.

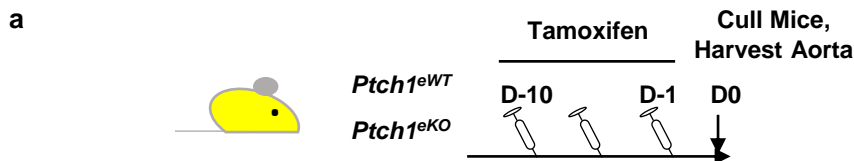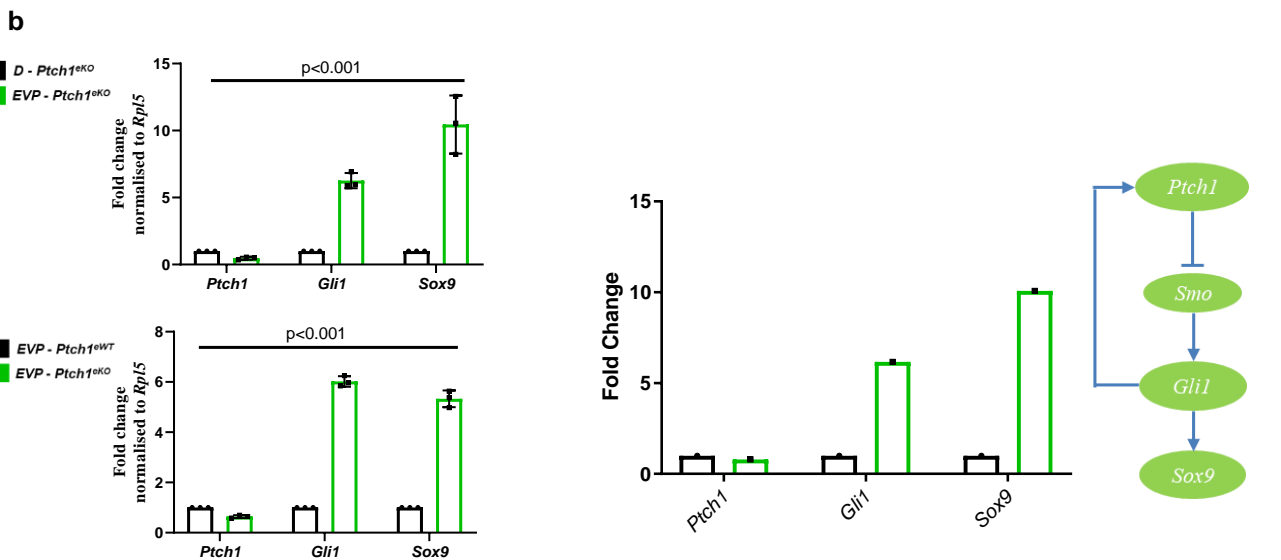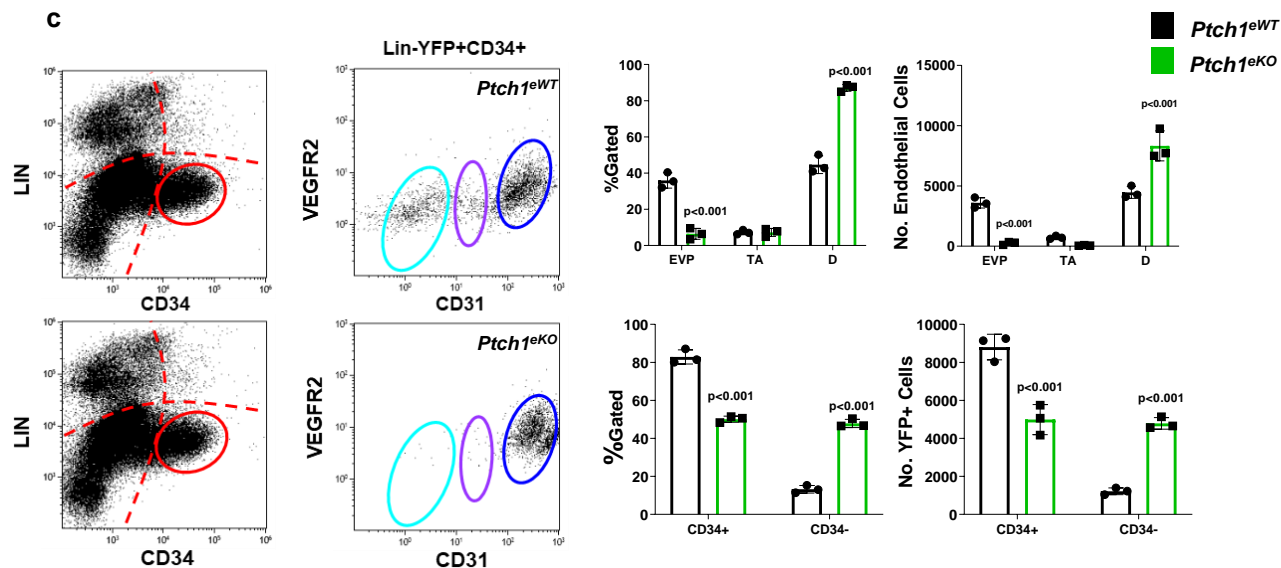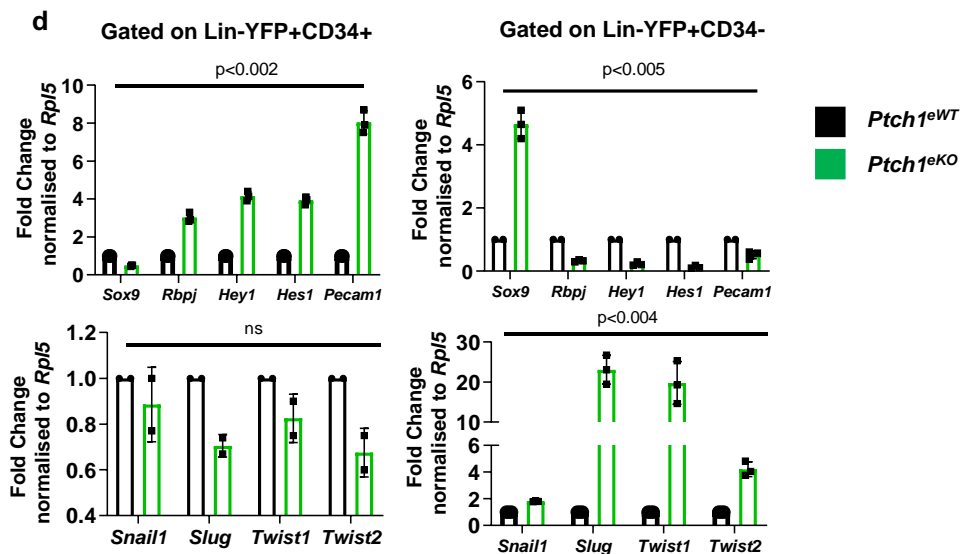

## Supplementary Figure 7. Molecular characterisation of the hedgehog pathway in endovascular progenitors

a) Schematic diagram demonstrating experimental set up using conditional vascular specific *Ptch1* knockout mice *Ptch1<sup>fl/fl</sup>/Cdh5-Cre<sup>ER</sup> RosaYFP (Ptch1<sup>eKO</sup>)*.

b) qPCR analysis of key hedgehog-signalling genes in EVP vs D and *Ptch1<sup>eKO</sup>* and wild-type controls *Ptch1<sup>eWT</sup>* within the aorta. Previously published bulk RNA sequencing of EVPs vs D cells in WT mice shows up-regulated hedgehog signalling constituents in the progenitor fraction (\*\*p<0.01; \*\*\*p<0.001 vs *Ptch1<sup>eWT</sup>*; n=3; cells were sorted from 3 groups of 5 biologically independent animals mean ± SD; p values were calculated by 2-way ANOVA with multiple comparison of row mean).

c) Flow cytometry plots showing the aortic endothelium harbour a distinct CD34 positive, lineage (Lin) negative population (red gate) that is entirely YFP positive showing the endothelial hierarchy and changes between wild-type controls (*Ptch1<sup>eWT</sup>*) and *Ptch1<sup>eKO</sup>* mice after 10 days tamoxifen. Percentage gated and number of EVP and total CD34 positive cells is significantly reduced in *Ptch1<sup>eKO</sup>*. A significant increase in CD34 negative is observed in *Ptch1<sup>eKO</sup>* (p<0.001 vs *Ptch1<sup>eWT</sup>*; n= 3 biologically independent animals; mean ± SD; p values were calculated by 2-way ANOVA with multiple comparison of row mean).

d) qPCR analysis conducted to compare key endothelial and EndMT genes between Lin-YFP+CD34+ and Lin-YFP+CD34- cells from *Ptch1<sup>eKO</sup>* compared to *Ptch1<sup>eWT</sup>* (\*\*\*p<0.001 vs *Ptch1<sup>eWT</sup>*; n=3; cells were sorted from 3 groups of 5 biologically independent animals mean ± SD; p values were calculated by 2-way ANOVA with multiple comparison of row mean).

## Supplementary Table 1: siRNA sequence

| siRNA      | <i>Sox9</i>                 | Scrambled                   |
|------------|-----------------------------|-----------------------------|
| Sequence 1 | 5'- GGGUGAGCUUUGAUUAAUU -3' | 5'- UGGUUUACAUGUCGACUAA -3' |
| Sequence 2 | 5'- CGUUUAACCUUCAAGAAU -3'  | 5'- UGGUUUACAUGUUUUCUGA -3' |
| Sequence 3 | 5'- GUAUGGUCAUCUGUUGUUA -3' | 5'- UGGUUUACAUGUUUCCUA -3'  |
| Sequence 4 | 5'- CCUUCGACGUCAAUGAGUU -3' | 5'- UGGUUUACAUGUUGUGUGA -3' |

## Supplementary Table 2: qPCR Primers

### Mouse primers

| Target                     | Forward Primer           | Reverse Primer          |
|----------------------------|--------------------------|-------------------------|
| <i>Rpl5</i>                | GGCGGCGAGAGGGTAAAA       | GCACAGACGATCATATCCCCTTC |
| <i>Ptch1<sup>Non</sup></i> | GGACCGTGTCTGAGGTGTCT     | GGCAAACCGGACGACACTT     |
| <i>Ptch2</i>               | CTCCGCACCTCATATCCTAGC    | TCCCAGGAAGAGCACTTTGC    |
| <i>Gli1</i>                | GCATGGGAACAGAAGGACTTTC   | CCTGGGACCCTGACATAAAGTT  |
| <i>Gli2</i>                | AGAAGTCTCCATCTCAGAGGCTCA | CACCTGCATGCTAGAGGCAA    |
| <i>Sox9</i>                | AGTACCCGCATCTGCACAAC     | ACGAAGGGTCTCTTCTCGCT    |
| <i>Slug</i>                | ACTGGACACACACACAGTTATT   | ACTTACACGCCCCAAGGATG    |
| <i>Twist1</i>              | AGCTGAGCAAGATTCAGACC     | CATCTTGGAGTCCAGCTCGT    |
| <i>Twist2</i>              | CCAGGTACATAGACTTCCTC     | GAGAAGGCGTAGCTGAGACG    |
| <i>Snail1</i>              | GCGGAGTTGACTACCGACC      | GAAGGTGAACTCCACACACG    |
| <i>Hey1</i>                | GCGCGGACGAGAATGGAAA      | TCAGGTGATCCACAGTCATCTG  |
| <i>Hes1</i>                | CCAGCCAGTGTCAACACGA      | AATGCCGGGAGCTATCTTTCT   |
| <i>Il33</i>                | ATTTCCCCGGCAAAGTTTACG    | AACGGAGTCTCATGCAGTAGA   |
| <i>p16</i>                 | GCAGGTTCTTTGGTCACTGT     | TGTTACGAAAGCCAGAGCG     |
| <i>p21</i>                 | CCTGGTGATGTCCGACCTG      | CCATGAGCGCATCGCAATC     |
| <i>p57</i>                 | AGAGAACTGCGCAGGAGAAC     | TCTGGCCGTTAGCCTCTAAA    |
| <i>Rbpj</i>                | AGTTGCACAGAAGTCTTACGG    | CCTATTCCAATAAACGCACAGGG |
| <i>TGFβ</i>                | GACCGCAACAACGCCATC       | TCTGCACGGGACAGCAATG     |
| <i>Pecam1</i>              | GCCAAGGCCAAACAGAAAC      | CTTCCACACTAGGCTCAGAAAT  |

### Human primers

| Target       | Forward Primer         | Reverse Primer         |
|--------------|------------------------|------------------------|
| <i>HPRT</i>  | CCTGGCGTCGTGATTAGTGAT  | AGACGTTCACTCCTGTCCATAA |
| <i>SOX18</i> | CGCGTGTATGTTTGGTTC     | ATGTAACCCTGGCAACTC     |
| <i>SOX9</i>  | AGCGAACGCACATCAAGAC    | CTGTAGGCGATCTGTTGGGG   |
| <i>IL33</i>  | CCACTGAGGAAAGAGCCA     | TGAGCCTATCGTTTGGAACTG  |
| <i>HEY1</i>  | TGGAGAGGCGCCGCTGTAGTTA | CAAGGGCGTGCGCGTCAAAGTA |
| <i>HES1</i>  | GTCAACACGACACCGGATAA   | TTCAGCTGGCTCAGACTTTC   |
